# Supplementary material for: Expression of Versican 3′-Untranslated Region Modulates Endogenous MicroRNA Functions
Source: PubMed Central journal article supplement (PMC2963607; doi:10.1371/journal.pone.0013599), 2010-10-25

**Vector**

**VUTR**

**Week1**

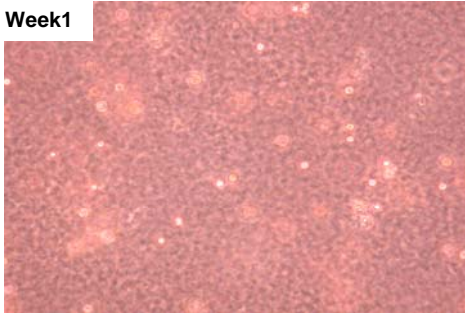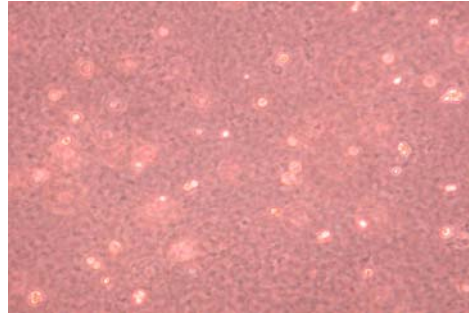

**Week2**

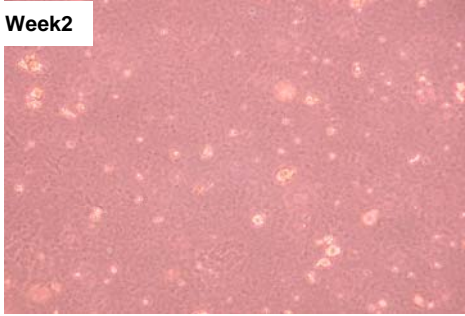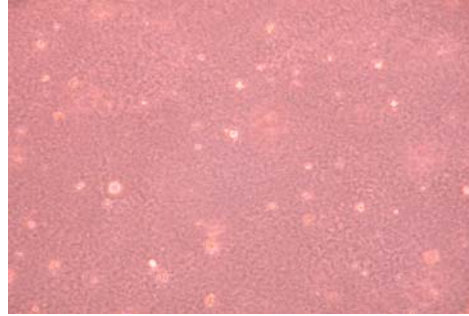

**Week3**

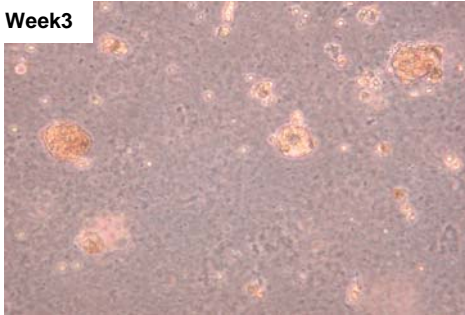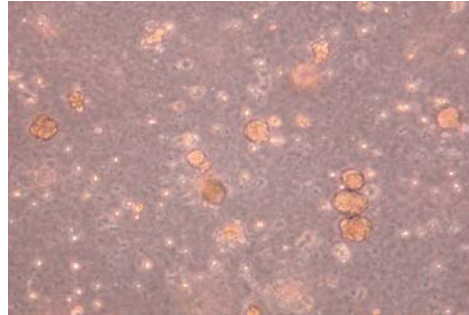

**Colony Formation**

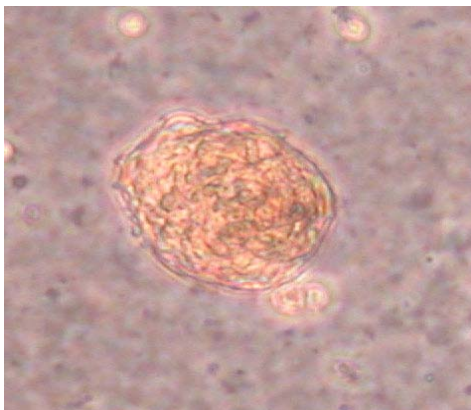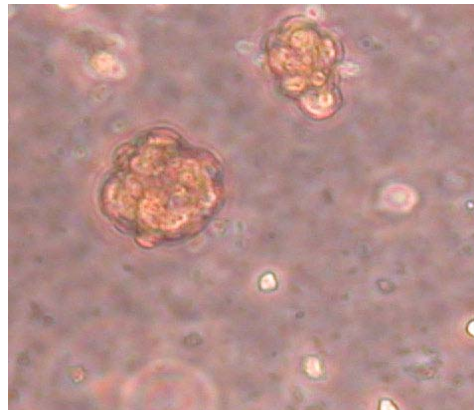

Supplement: pone.0013599.s001.pdf [file pone.0013599.s001.pdf]
