# Supplementary material for: Expression of Versican 3′-Untranslated Region Modulates Endogenous MicroRNA Functions
Source: PubMed Central journal article supplement (PMC2963607; doi:10.1371/journal.pone.0013599), 2010-10-25

# Collagen staining

Vector

VUTR

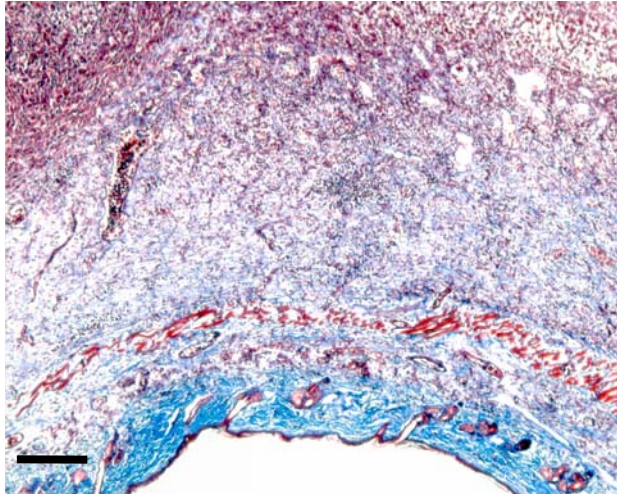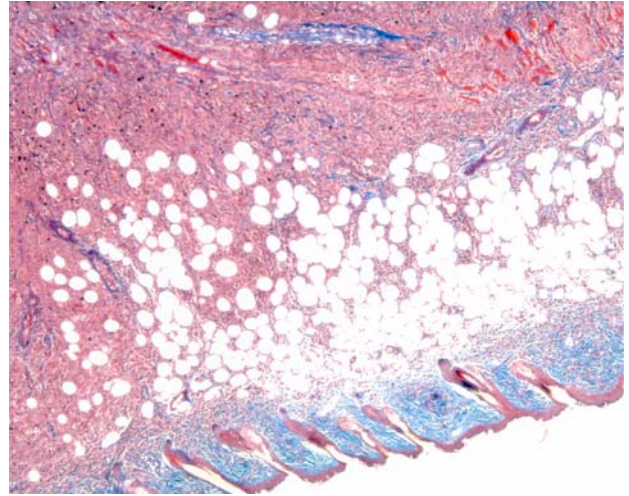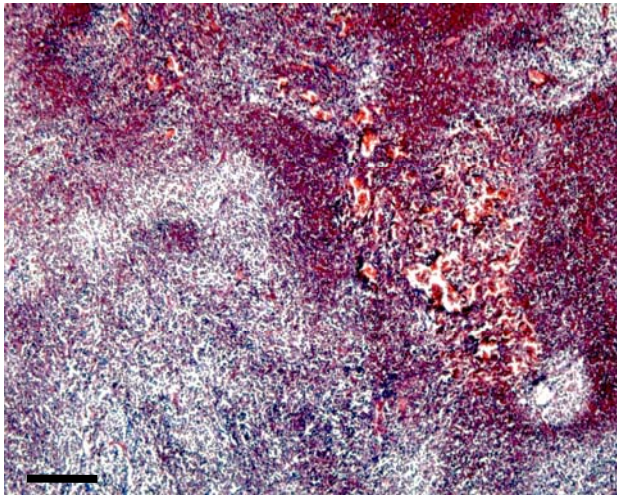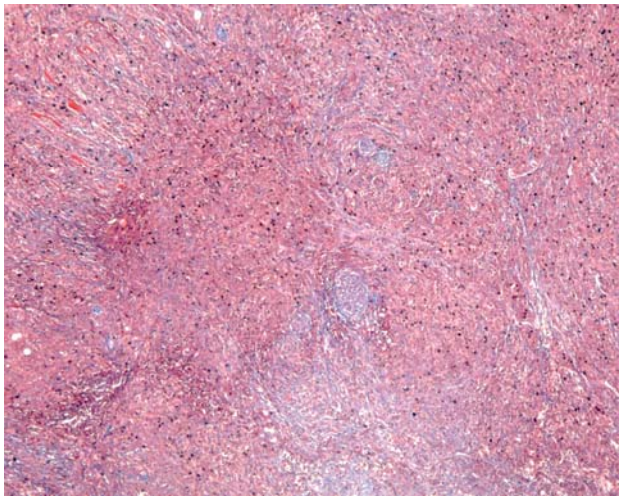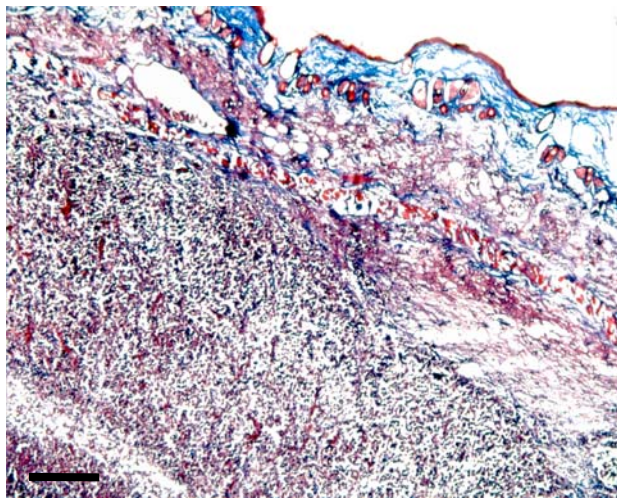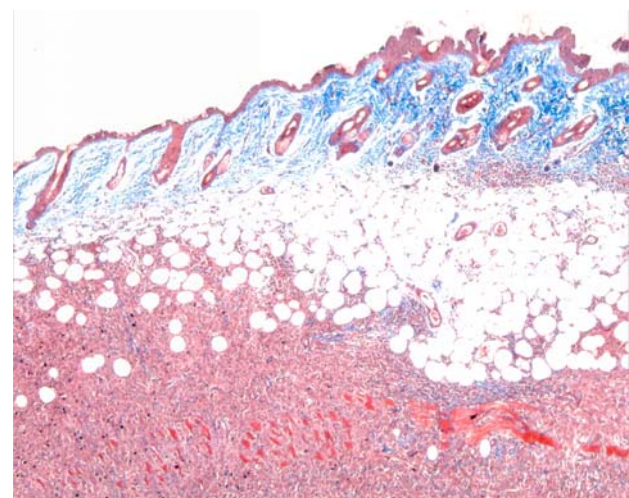

Supplement: pone.0013599.s002.pdf [file pone.0013599.s002.pdf]
