# Supplementary material for: Expression of Versican 3′-Untranslated Region Modulates Endogenous MicroRNA Functions
Source: PubMed Central journal article supplement (PMC2963607; doi:10.1371/journal.pone.0013599), 2010-10-25
Supplement: pone.0013599.s004.pdf [file pone.0013599.s004.pdf]

**a**

## RB1 Conserved binding sites of miRNAs in

3' auugGUUACACGUCUGAUGACa 5' hsa-miR-199a-3p  
: | | | | | | | | | |  
654:5' **augaUAcUaU-CAUACUACUGa** 3' Human  
614:5' **augaUAcUGU-CuUACUACUGa** 3' Mouse

3' ucaugUAGUAGAUUAUGACAu 5' hsa-miR-144  
| | | | | | | | | |  
574:5' **uuggaAUCugAUAUACUGUg** 3' Human  
603:5' **uauaAUCauUGAUACUGUc** 3' Mouse

**b**

## PTEN

### miR-144

3' ucAUGUAGUAGAUUAUGACAu 5' hsa-miR-144  
| | | | : | | | | | | | |  
2906:5' **uuUACCUU-UAAAUACUGUu** 3' Human  
2907:5' **uuUACCUU-UAAAUACUGUu** 3' Mouse

### miR-136

3' agGUAGUAGUUUUGUUUACCUCa 5' hsa-miR-136  
| | : | : | | | | : | | | | | |  
289:5' **cCAGUUUUUAUAAAAAGUGGAGa** 3' Human  
308:5' **ccaguuUUAUAAAAAGUGGAGa** 3' Mouse

3' agguagUAGUUUUGUUUACCUCa 5' hsa-miR-136  
: | : | : : : | | | | | | | |  
490:5' **auucggGUUAGGG-GAAUGGAGg** 3' Human  
501:5' **gcaCuUGgguuGG-GAAUGGAGg** 3' Mouse

3' aggUAGUAGUUUUGUUUACCUCa 5' hsa-miR-136  
: | : | | | | | : | | : | | | | | | |  
2759:5' **agGUUAUaAAcuUAAGUGGAGu** 3' Human  
2762:5' **agGUUAUaAAcuUAAGUGGAGu** 3' Mouse
