# Supplementary material for: Expression of Versican 3′-Untranslated Region Modulates Endogenous MicroRNA Functions
Source: PubMed Central journal article supplement (PMC2963607; doi:10.1371/journal.pone.0013599), 2010-10-25
Supplement: pone.0013599.s005.pdf [file pone.0013599.s005.pdf]

**a**

**Rb1**

3' auugGUUACACGUCUGAUGACa 5' **mmu-miR-199a\***  
:| ||| | |||||

614:5' augaUACUGU-CUUACUACUGa 3' **Rb1**

3' auuGGUUACACGUCUGAUGACa 5' **mmu-miR-199a\***  
:::| || |||||:|

692:5' gcuUUGAACUGAAGACUAUUGa 3' **Rb1**

3' gcGGUUAUAAAUGCACGACGau 5' **mmu-miR-16**  
||| | | :| |||||

243:5' uuCCAACAUGAGCCUGCUGCcc 3' **Rb1**

**b**

**PTEN**

3' uugauaugUUGGAUGAUGGAGu 5' **mmu-let-7a**  
||: |||||:|

3729:5' uaggcucaAAUAUACUAUCUCc 3' **Pten**

3' uugauaugUUAGAUGAUGGAGu 5' **mmu-let-7f**  
||| |||||:|

3729:5' uaggcucaAAUAUACUAUCUCc 3' **Pten**

3' gcGGUUAUAAAUGCACGACGAu 5' **mmu-miR-16**  
:||| ||| | |:|

4308:5' auUCAACAUU--CUUGUUGCUa 3' **Pten**
