# Supplementary material for: Expression of Versican 3′-Untranslated Region Modulates Endogenous MicroRNA Functions
Source: PubMed Central journal article supplement (PMC2963607; doi:10.1371/journal.pone.0013599), 2010-10-25
Supplement: pone.0013599.s006.pdf [file pone.0013599.s006.pdf]

| Primer                    | Sequence                                                                                  |
|---------------------------|-------------------------------------------------------------------------------------------|
| huRB1-Sacl                | 5'ccc ggg <b><u>gagctc</u></b> tgaggatctcaggaccttggtg                                     |
| huRB1-miR144Mull          | 5'ggg ccc <b><u>acgcgt</u></b> gc aaaa tttt ata aaac aag cac                              |
| huRB1-miR144Mull-mut      | 5'ggg ccc <b><u>acgcgt</u></b> gc aaaa tttt ata aaac aag cac <b><u>tgtca</u></b> atatc    |
| huRB1-miR199a*Mull        | 5'ggg ccc <b><u>acgcgt</u></b> ca ttct gagg tat gaaa tct gttt                             |
| huRB1-miR199a*Mull-mut    | 5'ggg ccc <b><u>acgcgt</u></b> ca ttct gagg tat gaaa tct gttt <b><u>gtcatc</u></b> tat ga |
| huPTEN-Sacl               | 5'ccc ggg <b><u>gagctc</u></b> tgaatTTTTTTTatcaagaggat                                    |
| huPTEN-miR144Mull         | 5'ggg ccc <b><u>acgcgt</u></b> gtg caaa gggg tagg at gtg aac                              |
| huPTEN-miR144Mull-mut     | 5'ggg ccc <b><u>acgcgt</u></b> gtg caaa gggg tagg at gtg aac <b><u>gtcat</u></b> tat cac  |
| huPTEN-miR136Mull         | 5'ggg ccc <b><u>acgcgt</u></b> aatta ttt ccttt ct gag ca ttcc                             |
| huPTEN-miR136Mull-mut     | 5'ggg ccc <b><u>acgcgt</u></b> aatta ttt ccttt ct gag ca ttcc <b><u>gaggt</u></b> tt ccc  |
| miR-199a* Realtime primer | 5' tacagtagtctgcacattggtt                                                                 |
| miR-17-5p Realtime primer | 5'caaagtgcttacagtgcag                                                                     |
| miR-328 Realtime primer   | 5' ctggccctctctgcccttccgt                                                                 |
| Human U6 primer forward   | 5' gtgctcgcttcggcagcacatatac                                                              |
| Human U6 primer reverse   | 5' aa aaa tat gg aa cgc ttc acga atttg                                                    |
| mo-Gapdh1F                | 5' atg gtg aag gtc tgt gtg atc atc                                                        |
| mo-Gapdh250R              | 5' tgg gtt ctc act cct gga aga agg                                                        |
